# Supplementary material
Source: PubMed Central journal article supplement (PMC9481694)
Supplement: NIHMS1825518-supplement-1.pdf [file NIHMS1825518-supplement-1.pdf]

# Genetic Risk of Second Primary Cancer in Breast Cancer Survivors: The Multiethnic Cohort Study

Fei Chen<sup>1</sup>, Sungshim L. Park<sup>2</sup>, Lynne R. Wilkens<sup>2</sup>, Peggy Wan<sup>1</sup>, Steven N. Hart<sup>3</sup>, Chunling Hu<sup>4</sup>,  
Siddhartha S. Yadav<sup>5</sup>, Fergus J. Couch<sup>3,4</sup>, David V. Conti<sup>1</sup>, Adam J. de Smith<sup>1</sup>, Christopher A.  
Haiman<sup>1</sup>

<sup>1</sup> Center for Genetic Epidemiology, Department of Population and Public Health Sciences, Keck School of Medicine, University of Southern California, Los Angeles, CA, 90033, USA.

<sup>2</sup> Cancer Epidemiology Program, University of Hawaii, Honolulu, HI, 96813, USA.

<sup>3</sup> Department of Quantitative Health Sciences, Mayo Clinic, Rochester, MN, 55905, USA.

<sup>4</sup> Department of Laboratory Medicine and Pathology, Mayo Clinic, Rochester, MN, 55905, USA.

<sup>5</sup> Department of Oncology, Mayo Clinic, Rochester, MN, 55905, USA.

## Supplementary Materials

|                                                                                                                                     |   |
|-------------------------------------------------------------------------------------------------------------------------------------|---|
| <u>SUPPLEMENTARY FIGURES</u> .....                                                                                                  | 2 |
| SUPPLEMENTARY FIGURE 1 OVERVIEW OF STUDY DESIGN AND STATISTICAL ANALYSIS.....                                                       | 2 |
| SUPPLEMENTARY FIGURE 2 CARRIER FREQUENCY OF PATHOGENIC VARIANTS IN 11 GENES TESTED IN THE SINGLE-GENE ASSOCIATION ANALYSIS. ....    | 3 |
| <u>SUPPLEMENTARY TABLES</u> .....                                                                                                   | 4 |
| SUPPLEMENTARY TABLE 1 ASSOCIATIONS OF NON-GENETIC FACTORS WITH SPC, SPBC OR SPNBC .....                                             | 4 |
| SUPPLEMENTARY TABLE 2 CLINICAL CHARACTERISTICS OF WOMEN CARRYING PVs IN SELECTED GENES .....                                        | 5 |
| SUPPLEMENTARY TABLE 3 ASSOCIATION OF GERMLINE PVs IN SELECTED GENES WITH SPC, SPBC OR SPNBC: SENSITIVITY ANALYSES.....              | 6 |
| SUPPLEMENTARY TABLE 4 GENE SET ASSOCIATIONS WITH SPC, SPBC OR SPNBC EXCLUDING <i>BRCA1</i> , <i>BRCA2</i> AND/OR <i>ERCC2</i> ..... | 8 |
| SUPPLEMENTARY TABLE 5 ASSOCIATION OF PVs IN <i>ERCC2</i> GENE WITH BREAST CANCER .....                                              | 9 |

## SUPPLEMENTARY FIGURES

### Supplementary Figure 1 Overview of Study Design and Statistical Analysis

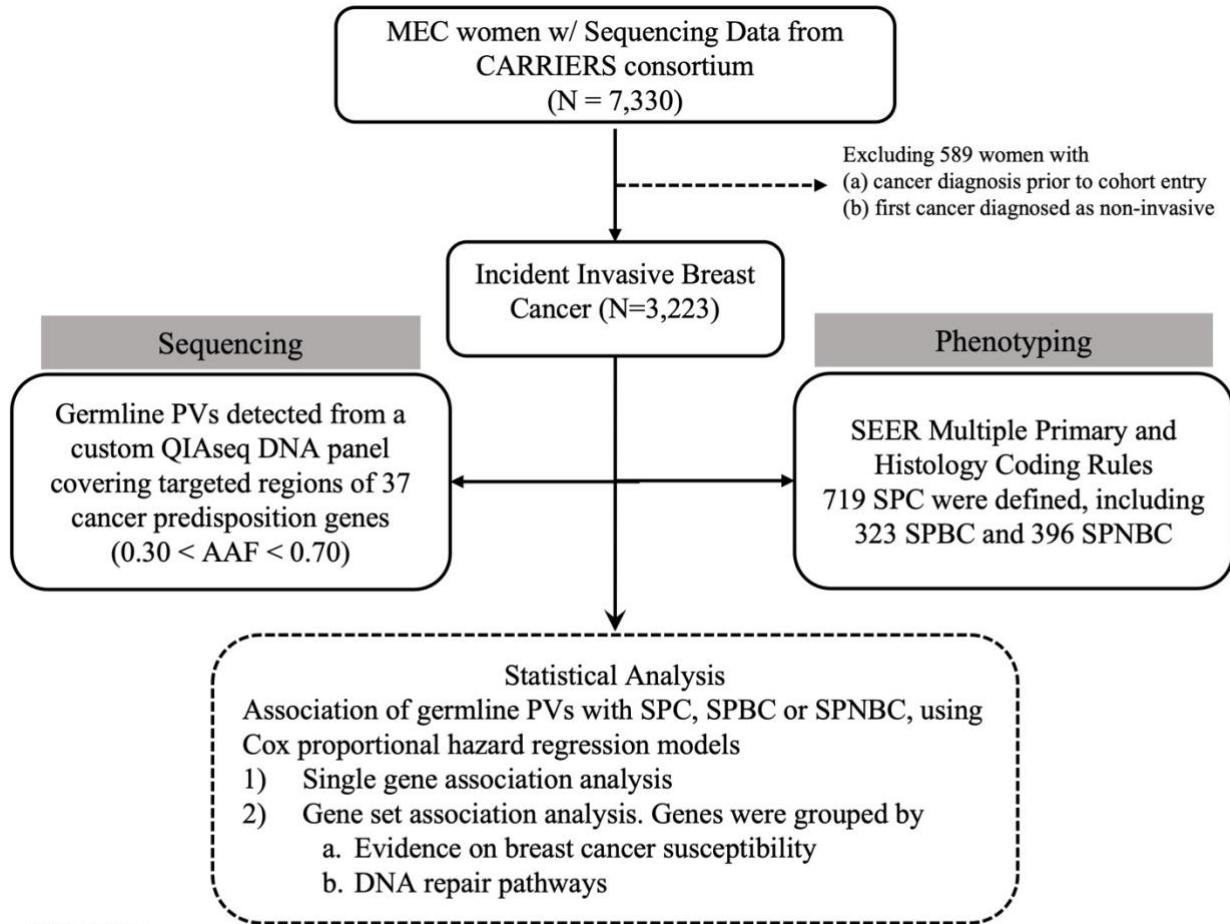

#### Abbreviations

MEC: Multiethnic Cohort Study  
CARRIERS: CAncer RiSk Estimates Related to Susceptibility Consortium  
SPC: second primary cancer  
SPBC: second primary breast cancer  
SPNBC: second primary non-breast cancer  
PVs: pathogenic variants  
AAF: alternate allele fraction

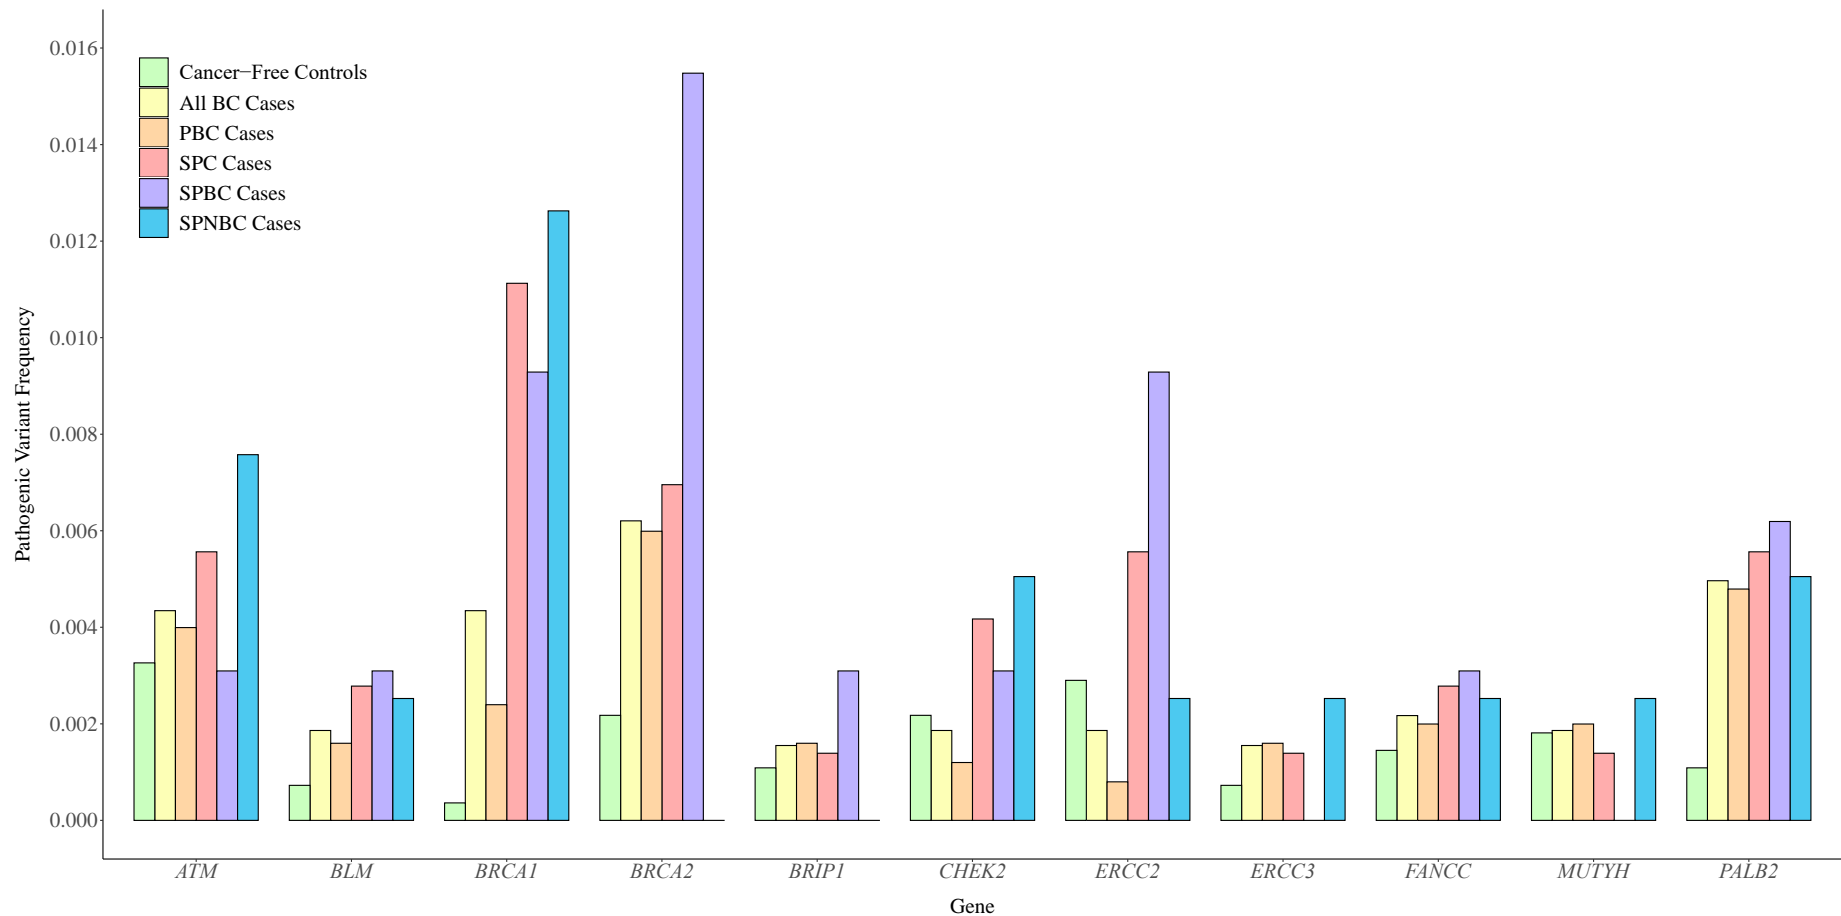

**Supplementary Figure 2 Carrier Frequency of pathogenic variants in 11 genes tested in the single-gene association analysis.**

Frequencies were estimated in 2,758 cancer-free controls, 3,223 breast cancer (BC) cases, 2,504 women with only primary breast cancer (PBC), 719 women with second primary cancer (SPC), 323 women with second primary breast cancer (SPBC) and 396 women with second primary non-breast cancer (SPNBC).

**SUPPLEMENTARY TABLES**

**Supplementary Table 1 Associations of non-genetic factors with SPC, SPBC or SPNBC**

| Variables                               | SPC                      |       | SPBC                     |       | SPNBC                    |       |
|-----------------------------------------|--------------------------|-------|--------------------------|-------|--------------------------|-------|
|                                         | HR (95% CI) <sup>1</sup> | P     | HR (95% CI) <sup>1</sup> | P     | HR (95% CI) <sup>1</sup> | P     |
| Age at diagnosis of 1 <sup>st</sup> BC  | 1.01 (1.00 - 1.03)       | 0.08  | 1.02 (0.99 - 1.04)       | 0.17  | 1.01 (0.99 - 1.03)       | 0.15  |
| Family history of breast cancer         |                          |       |                          |       |                          |       |
| Negative                                | 1.00 (reference)         | --    | 1.00 (reference)         | --    | 1.00 (reference)         | --    |
| Positive                                | 1.30 (1.07 - 1.56)       | 0.007 | 1.42 (1.08 - 1.88)       | 0.01  | 1.28 (0.99 - 1.64)       | 0.06  |
| Race/Ethnicity                          |                          |       |                          |       |                          |       |
| White                                   | 1.00 (reference)         | --    | 1.00 (reference)         | --    | 1.00 (reference)         | --    |
| African American                        | 0.87 (0.70 - 1.10)       | 0.25  | 0.87 (0.62 - 1.23)       | 0.43  | 0.86 (0.64 - 1.17)       | 0.34  |
| Japanese American                       | 0.76 (0.62 - 0.92)       | 0.006 | 0.87 (0.64 - 1.16)       | 0.34  | 0.65 (0.50 - 0.85)       | 0.002 |
| Latino                                  | 0.69 (0.55 - 0.88)       | 0.002 | 0.59 (0.40 - 0.86)       | 0.006 | 0.75 (0.56 - 1.02)       | 0.06  |
| Native Hawaiian                         | 1.08 (0.82 - 1.42)       | 0.59  | 1.30 (0.88 - 1.92)       | 0.18  | 0.90 (0.61 - 1.33)       | 0.61  |
| Tumor stage of 1 <sup>st</sup> BC       |                          |       |                          |       |                          |       |
| Localized                               | 1.00 (reference)         | --    | 1.00 (reference)         | --    | 1.00 (reference)         | --    |
| Regional                                | 1.02 (0.84 - 1.24)       | 0.82  | 0.94 (0.70 - 1.26)       | 0.67  | 1.08 (0.83 - 1.41)       | 0.55  |
| Distant                                 | 1.43 (0.71 - 2.89)       | 0.32  | 1.92 (0.78 - 4.70)       | 0.16  | 0.98 (0.31 - 3.09)       | 0.98  |
| ER status of 1 <sup>st</sup> BC         |                          |       |                          |       |                          |       |
| Negative                                | 1.00 (reference)         | --    | 1.00 (reference)         | --    | 1.00 (reference)         | --    |
| Positive                                | 1.06 (0.81 - 1.39)       | 0.67  | 0.97 (0.68 - 1.37)       | 0.86  | 1.13 (0.79 - 1.63)       | 0.50  |
| PR status of 1 <sup>st</sup> BC         |                          |       |                          |       |                          |       |
| Negative                                | 1.00 (reference)         | --    | 1.00 (reference)         | --    | 1.00 (reference)         | --    |
| Positive                                | 0.84 (0.67 - 1.05)       | 0.12  | 0.97 (0.68 - 1.37)       | 0.83  | 0.74 (0.55 - 1.00)       | 0.05  |
| Radiotherapy for 1 <sup>st</sup> BC     |                          |       |                          |       |                          |       |
| Not administered                        | 1.00 (reference)         | --    | 1.00 (reference)         | --    | 1.00 (reference)         | --    |
| Administered                            | 0.93 (0.79 - 1.09)       | 0.36  | 0.78 (0.62 - 0.99)       | 0.04  | 1.09 (0.88 - 1.34)       | 0.44  |
| Chemotherapy for 1 <sup>st</sup> BC     |                          |       |                          |       |                          |       |
| Not administered                        | 1.00 (reference)         | --    | 1.00 (reference)         | --    | 1.00 (reference)         | --    |
| Administered                            | 1.06 (0.87 - 1.29)       | 0.58  | 1.13 (0.85 - 1.52)       | 0.40  | 0.99 (0.75 - 1.30)       | 0.95  |
| Hormonal therapy for 1 <sup>st</sup> BC |                          |       |                          |       |                          |       |
| Not administered                        | 1.00 (reference)         | --    | 1.00 (reference)         | --    | 1.00 (reference)         | --    |
| Administered                            | 0.97 (0.82 - 1.14)       | 0.70  | 0.91 (0.71 - 1.16)       | 0.43  | 1.01 (0.81 - 1.26)       | 0.91  |

<sup>1</sup> Hazard ratios (HRs) and 95% confidence intervals (CIs) were estimated from the Cox proportional hazard regression models adjusting for all variables listed in this table given each SPC phenotype.

**Supplementary Table 2 Clinical characteristics of women carrying PVs in selected genes**

| Characteristics                                        | <i>ATM</i> | <i>BRCA1</i> | <i>BRCA2</i> | <i>CHEK2</i> | <i>PALB2</i> | <i>BLM</i> | <i>BRIP1</i> | <i>ERCC3</i> | <i>FANCC</i> | <i>ERCC2</i> | <i>MUTYH</i> |
|--------------------------------------------------------|------------|--------------|--------------|--------------|--------------|------------|--------------|--------------|--------------|--------------|--------------|
| No. Carriers                                           | 14         | 14           | 20           | 6            | 16           | 6          | 5            | 5            | 7            | 6            | 6            |
| Mean age at 1 <sup>st</sup> BC diagnosis               | 63.0       | 64.4         | 62.7         | 65.9         | 69.2         | 68.3       | 69.0         | 71.3         | 66.6         | 66.9         | 62.0         |
| Mean survival years                                    | 8.7        | 11.0         | 9.8          | 10.1         | 10.7         | 8.5        | 11.8         | 9.5          | 10.0         | 8.6          | 14.7         |
| Tumor stage of 1 <sup>st</sup> BC                      |            |              |              |              |              |            |              |              |              |              |              |
| Localized                                              | 8          | 11           | 11           | 4            | 12           | 5          | 4            | 3            | 7            | 3            | 5            |
| Regional                                               | 5          | 3            | 7            | 2            | 4            | 0          | 1            | 2            | 0            | 3            | 1            |
| Distant                                                | 0          | 0            | 2            | 0            | 0            | 1          | 0            | 0            | 0            | 0            | 0            |
| Missing                                                | 1          | 0            | 0            | 0            | 0            | 0          | 0            | 0            | 0            | 0            | 0            |
| ER status of 1 <sup>st</sup> BC                        |            |              |              |              |              |            |              |              |              |              |              |
| Negative                                               | 2          | 7            | 8            | 1            | 6            | 1          | 0            | 0            | 3            | 0            | 2            |
| Positive                                               | 9          | 5            | 9            | 4            | 7            | 4          | 4            | 5            | 3            | 5            | 4            |
| Missing                                                | 3          | 2            | 3            | 1            | 3            | 1          | 1            | 0            | 1            | 1            | 0            |
| PR status of 1 <sup>st</sup> BC                        |            |              |              |              |              |            |              |              |              |              |              |
| Negative                                               | 2          | 8            | 8            | 2            | 6            | 1          | 0            | 0            | 3            | 1            | 3            |
| Positive                                               | 9          | 4            | 9            | 3            | 7            | 4          | 4            | 5            | 3            | 3            | 3            |
| Missing                                                | 3          | 2            | 3            | 1            | 3            | 1          | 1            | 0            | 1            | 2            | 0            |
| Radiation Treatment of 1 <sup>st</sup> BC <sup>1</sup> |            |              |              |              |              |            |              |              |              |              |              |
| Not administered                                       | 7          | 6            | 11           | 5            | 10           | 2          | 2            | 1            | 4            | 2            | 3            |
| Administered                                           | 7          | 8            | 9            | 1            | 6            | 4          | 3            | 4            | 3            | 4            | 3            |
| Missing                                                | 0          | 0            | 0            | 0            | 0            | 0          | 0            | 0            | 0            | 0            | 0            |
| Chemotherapy of 1 <sup>st</sup> BC <sup>1</sup>        |            |              |              |              |              |            |              |              |              |              |              |
| Not administered                                       | 6          | 7            | 8            | 4            | 11           | 4          | 3            | 3            | 7            | 4            | 4            |
| Administered                                           | 8          | 7            | 12           | 2            | 5            | 2          | 2            | 1            | 0            | 1            | 2            |
| Missing                                                | 0          | 0            | 0            | 0            | 0            | 0          | 0            | 1            | 0            | 1            | 0            |
| Hormonal Therapy of 1 <sup>st</sup> BC <sup>1</sup>    |            |              |              |              |              |            |              |              |              |              |              |
| Not administered                                       | 9          | 10           | 10           | 3            | 12           | 4          | 3            | 2            | 3            | 4            | 4            |
| Administered                                           | 4          | 4            | 9            | 3            | 4            | 1          | 2            | 3            | 3            | 1            | 2            |
| Missing                                                | 1          | 0            | 1            | 0            | 0            | 1          | 0            | 0            | 1            | 1            | 0            |
| Cause of Death                                         |            |              |              |              |              |            |              |              |              |              |              |
| Alive                                                  | 10         | 11           | 12           | 4            | 11           | 2          | 4            | 4            | 4            | 4            | 4            |
| Breast Cancer                                          | 2          | 1            | 3            | 1            | 1            | 2          | 0            | 0            | 1            | 1            | 0            |
| Others                                                 | 2          | 2            | 5            | 1            | 4            | 2          | 1            | 1            | 2            | 1            | 2            |

<sup>1</sup> First-course treatment from SEER cancer registry

**Supplementary Table 3 Association of germline PVs in selected genes with SPC, SPBC or SPNBC: sensitivity analyses**

| Gene         | Sensitivity Analyses    | SPC                |       | SPBC               |       | SPNBC              |       |
|--------------|-------------------------|--------------------|-------|--------------------|-------|--------------------|-------|
|              |                         | HR (95% CI)        | P     | HR (95% CI)        | P     | HR (95% CI)        | P     |
| <i>ATM</i>   | SPA <sup>1</sup>        | 1.48 (0.55 - 3.98) | 0.47  | 0.85 (0.12 - 6.29) | 0.88  | 1.91 (0.61 - 6.00) | 0.29  |
|              | Imputation <sup>2</sup> | 1.52 (0.56 - 4.10) | 0.41  | 0.86 (0.12 - 6.35) | 0.88  | 1.99 (0.63 - 6.25) | 0.24  |
|              | MSM <sup>3</sup>        | 1.76 (0.65 - 4.76) | 0.27  | 1.04 (0.14 - 7.71) | 0.97  | 2.22 (0.71 - 6.99) | 0.17  |
| <i>BRCA1</i> | SPA <sup>1</sup>        | 2.28 (1.11 - 4.65) | 0.012 | 2.64 (0.82 - 8.43) | 0.07  | 2.98 (1.21 - 7.36) | 0.011 |
|              | Imputation <sup>2</sup> | 2.24 (1.10 - 4.58) | 0.027 | 2.61 (0.82 - 8.34) | 0.11  | 2.93 (1.19 - 7.22) | 0.020 |
|              | MSM <sup>3</sup>        | 2.65 (1.29 - 5.44) | 0.008 | 3.15 (0.98 - 10.2) | 0.06  | 3.48 (1.41 - 8.62) | 0.007 |
| <i>BRCA2</i> | SPA <sup>1</sup>        | 1.18 (0.49 - 2.88) | 0.72  | 2.24 (0.91 - 5.55) | 0.07  | --                 | --    |
|              | Imputation <sup>2</sup> | 1.14 (0.47 - 2.78) | 0.77  | 2.14 (0.87 - 5.27) | 0.10  | --                 | --    |
|              | MSM <sup>3</sup>        | 1.36 (0.56 - 3.32) | 0.50  | 2.61 (1.05 - 6.50) | 0.04  | --                 | --    |
| <i>CHEK2</i> | SPA <sup>1</sup>        | 2.03 (0.64 - 6.46) | 0.20  | 1.81 (0.24 - 13.6) | 0.52  | 2.32 (0.56 - 9.60) | 0.18  |
|              | Imputation <sup>2</sup> | 2.02 (0.63 - 6.42) | 0.24  | 1.71 (0.23 - 12.8) | 0.60  | 2.37 (0.57 - 9.79) | 0.23  |
|              | MSM <sup>3</sup>        | 2.47 (0.77 - 7.91) | 0.13  | 2.11 (0.28 - 16.0) | 0.47  | 2.84 (0.68 - 11.8) | 0.15  |
| <i>PALB2</i> | SPA <sup>1</sup>        | 0.89 (0.33 - 2.40) | 0.80  | 0.96 (0.24 - 3.94) | 0.95  | 0.95 (0.23 - 3.87) | 0.94  |
|              | Imputation <sup>2</sup> | 0.92 (0.34 - 2.46) | 0.86  | 0.97 (0.24 - 3.98) | 0.97  | 1.01 (0.25 - 4.10) | 0.99  |
|              | MSM <sup>3</sup>        | 0.77 (0.25 - 2.43) | 0.66  | 0.58 (0.08 - 4.20) | 0.59  | 1.10 (0.27 - 4.47) | 0.90  |
| <i>BLM</i>   | SPA <sup>1</sup>        | 2.50 (0.61 - 10.2) | 0.30  | 4.12 (0.55 - 30.9) | 0.32  | 2.74 (0.38 - 19.8) | 0.44  |
|              | Imputation <sup>2</sup> | 2.40 (0.59 - 9.74) | 0.22  | 4.29 (0.58 - 32.0) | 0.15  | 2.72 (0.38 - 19.6) | 0.32  |
|              | MSM <sup>3</sup>        | 2.81 (0.69 - 11.5) | 0.15  | 4.63 (0.61 - 35.2) | 0.14  | 2.87 (0.40 - 20.8) | 0.30  |
| <i>BRIP1</i> | SPA <sup>1</sup>        | 1.02 (0.14 - 7.34) | 0.98  | 1.99 (0.27 - 14.4) | 0.52  | --                 | --    |
|              | Imputation <sup>2</sup> | 1.05 (0.15 - 7.55) | 0.96  | 2.10 (0.29 - 15.2) | 0.46  | --                 | --    |
|              | MSM <sup>3</sup>        | --                 | --    | --                 | --    | --                 | --    |
| <i>ERCC3</i> | SPA <sup>1</sup>        | 1.24 (0.17 - 8.90) | 0.86  | --                 | --    | 2.21 (0.31 - 16.1) | 0.51  |
|              | Imputation <sup>2</sup> | 1.19 (0.17 - 8.57) | 0.86  | --                 | --    | 2.05 (0.28 - 14.8) | 0.48  |
|              | MSM <sup>3</sup>        | 1.41 (0.20 - 10.2) | 0.73  | --                 | --    | 2.34 (0.32 - 17.0) | 0.40  |
| <i>FANCC</i> | SPA <sup>1</sup>        | 1.28 (0.32 - 5.16) | 0.73  | 1.32 (0.18 - 9.52) | 0.77  | 1.07 (0.15 - 7.66) | 0.95  |
|              | Imputation <sup>2</sup> | 1.32 (0.33 - 5.34) | 0.69  | 1.36 (0.19 - 9.79) | 0.76  | 1.11 (0.16 - 7.99) | 0.91  |
|              | MSM <sup>3</sup>        | 1.60 (0.40 - 6.49) | 0.51  | 1.86 (0.26 - 13.5) | 0.54  | 1.25 (0.17 - 8.96) | 0.83  |
| <i>ERCC2</i> | SPA <sup>1</sup>        | 3.51 (1.29 - 9.54) | 0.014 | 5.09 (1.58 - 16.4) | 0.007 | 2.00 (0.27 - 14.6) | 0.44  |
|              | Imputation <sup>2</sup> | 3.55 (1.31 - 9.62) | 0.013 | 4.93 (1.53 - 15.9) | 0.007 | 2.05 (0.28 - 14.9) | 0.48  |
|              | MSM <sup>3</sup>        | 4.42 (1.62 - 12.1) | 0.004 | 6.84 (2.10 - 22.3) | 0.001 | 2.35 (0.32 - 17.2) | 0.40  |
| <i>MUTYH</i> | SPA <sup>1</sup>        | 0.51 (0.07 - 3.65) | 0.41  | --                 | --    | 0.88 (0.12 - 6.30) | 0.88  |
|              | Imputation <sup>2</sup> | 0.50 (0.07 - 3.57) | 0.49  | --                 | --    | 0.87 (0.12 - 6.24) | 0.89  |
|              | MSM <sup>3</sup>        | 0.58 (0.08 - 4.17) | 0.59  | --                 | --    | 0.95 (0.13 - 6.82) | 0.96  |

<sup>1</sup> P values were estimated using a saddlepoint approximation (SPA) method implemented in Cox proportional hazard models.

<sup>2</sup> Missing value was imputed with the ethnic-specific expected value.

<sup>3</sup> Association was estimated from multi-state models (MSM) that modeled a third primary cancer as a subsequent event following the diagnosis of a SPC while accounting for competing risk of death.

**Supplementary Table 4 Gene set associations with SPC, SPBC or SPNBC excluding *BRCA1*, *BRCA2* and/or *ERCC2***

| Gene Set (no. genes)       | PBC<br>No. Carriers (%) | SPC<br>No. Carriers (%) | HR (95% CI)         | P    |
|----------------------------|-------------------------|-------------------------|---------------------|------|
| <b>SPC</b>                 |                         |                         |                     |      |
| DNA repair genes (25)      | 96 (3.89)               | 21 (6.50)               | 1.60 (1.02 - 2.51)  | 0.04 |
| <i>BRCA1</i> excluded (24) | 92 (3.67)               | 34 (4.73)               | 1.26 (0.89 - 1.79)  | 0.19 |
| <i>ERCC2</i> excluded (24) | 96 (3.83)               | 38 (5.29)               | 1.30 (0.93 - 1.82)  | 0.12 |
| Both excluded (23)         | 90 (3.59)               | 30 (4.17)               | 1.16 (0.80 - 1.68)  | 0.43 |
| HR pathway (14)            | 74 (2.96)               | 26 (3.62)               | 1.18 (0.79 - 1.76)  | 0.42 |
| <i>BRCA1</i> excluded (13) | 68 (2.72)               | 18 (2.50)               | 0.96 (0.60 - 1.54)  | 0.87 |
| FA pathway (8)             | 51 (2.04)               | 21 (2.92)               | 1.26 (0.81 - 1.97)  | 0.30 |
| <i>BRCA1</i> excluded (7)  | 45 (1.80)               | 13 (1.81)               | 0.98 (0.56 - 1.71)  | 0.95 |
| NER pathway (2)            | 6 (0.24)                | 5 (0.70)                | 2.57 (1.06 - 6.27)  | 0.04 |
| <i>ERCC2</i> excluded (1)  | 4 (0.16)                | 1 (0.14)                | 1.24 (0.17 - 8.90)  | 0.83 |
| <b>SPBC<sup>1</sup></b>    |                         |                         |                     |      |
| DNA repair genes (25)      | 96 (3.89)               | 21 (6.50)               | 1.60 (1.02 - 2.51)  | 0.04 |
| <i>BRCA1</i> excluded (24) | 90 (3.64)               | 18 (5.57)               | 1.48 (0.91 - 2.40)  | 0.11 |
| <i>BRCA2</i> excluded (24) | 81 (3.28)               | 16 (4.95)               | 1.44 (0.86 - 2.39)  | 0.16 |
| <i>ERCC2</i> excluded (24) | 94 (3.80)               | 18 (5.57)               | 1.42 (0.87 - 2.30)  | 0.16 |
| All excluded (22)          | 73 (2.95)               | 10 (3.10)               | 1.04 (0.55 - 1.97)  | 0.89 |
| HR pathway (14)            | 72 (2.91)               | 14 (4.33)               | 1.45 (0.84 - 2.50)  | 0.19 |
| <i>BRCA1</i> excluded (13) | 66 (2.67)               | 11 (3.41)               | 1.27 (0.69 - 2.34)  | 0.44 |
| <i>BRCA2</i> excluded (13) | 57 (2.31)               | 9 (2.79)                | 1.19 (0.61 - 2.32)  | 0.62 |
| Both excluded (12)         | 51 (2.06)               | 6 (1.86)                | 0.93 (0.41 - 2.09)  | 0.85 |
| FA pathway (8)             | 50 (2.02)               | 13 (4.02)               | 1.76 (1.00 - 3.12)  | 0.05 |
| <i>BRCA1</i> excluded (7)  | 44 (1.78)               | 10 (3.10)               | 1.57 (0.83 - 2.99)  | 0.17 |
| <i>BRCA2</i> excluded (13) | 35 (1.42)               | 8 (2.48)                | 1.51 (0.74 - 3.09)  | 0.25 |
| Both excluded (12)         | 29 (1.17)               | 5 (1.55)                | 1.20 (0.49 - 2.92)  | 0.70 |
| NER pathway (2)            | 6 (0.24)                | 3 (0.93)                | 3.04 (0.96 - 9.69)  | 0.06 |
| <i>ERCC2</i> excluded (1)  | 4 (0.16)                | 0 (0.00)                | --                  | --   |
| <b>SPNBC</b>               |                         |                         |                     |      |
| DNA repair genes (25)      | 98 (3.91)               | 21 (5.30)               | 1.32 (0.85 - 2.07)  | 0.22 |
| <i>BRCA1</i> excluded (24) | 92 (3.67)               | 16 (4.04)               | 1.11 (0.67 - 1.85)  | 0.68 |
| <i>ERCC2</i> excluded (24) | 96 (3.83)               | 20 (5.05)               | 1.30 (0.82 - 2.05)  | 0.26 |
| Both excluded (23)         | 90 (3.59)               | 15 (3.79)               | 1.08 (0.64 - 1.82)  | 0.77 |
| HR pathway (14)            | 74 (2.96)               | 12 (3.03)               | 1.06 (0.59 - 1.91)  | 0.83 |
| <i>BRCA1</i> excluded (13) | 68 (2.72)               | 7 (1.77)                | 0.72 (0.34 - 1.53)  | 0.40 |
| FA pathway (8)             | 51 (2.04)               | 8 (2.02)                | 0.93 (0.46 - 1.89)  | 0.84 |
| <i>BRCA1</i> excluded (13) | 45 (1.80)               | 3 (0.76)                | 0.43 (0.14 - 1.34)  | 0.15 |
| NER pathway (2)            | 6 (0.24)                | 2 (0.51)                | 2.11 (0.52 - 8.58)  | 0.30 |
| <i>ERCC2</i> excluded (1)  | 4 (0.16)                | 1 (0.25)                | 2.21 (0.31 - 16.07) | 0.43 |

<sup>1</sup> A total of 33 women with bilateral mastectomy were further excluded in the analysis of SPBC.



**Supplementary Table 5 Association of PVs in *ERCC2* Gene with Breast Cancer**

|                   | Sample Size<br>No. controls/No. cases | Controls<br>No. Carriers (%) | Cases<br>No. Carriers (%) | OR (95% CI) <sup>1</sup> | P    |
|-------------------|---------------------------------------|------------------------------|---------------------------|--------------------------|------|
| <b>CARRIERS</b>   |                                       |                              |                           |                          |      |
| Overall           | 31874/36548                           | 159 (0.50)                   | 171 (0.47)                | 0.90 (0.72 – 1.12)       | 0.34 |
| White             | 26945/28720                           | 149 (0.55)                   | 152 (0.53)                | 0.90 (0.71 – 1.13)       | 0.35 |
| African American  | 1220/1880                             | 1 (0.08)                     | 7 (0.37)                  | 4.63 (0.57 – 37.8)       | 0.15 |
| Asian             | 1381/1929                             | 3 (0.22)                     | 3 (0.16)                  | 0.56 (0.10 – 3.01)       | 0.50 |
| Latino            | 1450/2208                             | 3 (0.21)                     | 4 (0.18)                  | 1.14 (0.20 – 6.35)       | 0.88 |
| <b>MEC</b>        |                                       |                              |                           |                          |      |
| Overall           | 2758/3223                             | 8 (0.29)                     | 6 (0.19)                  | 0.64 (0.22 – 1.86)       | 0.41 |
| White             | 614/755                               | 4 (0.65)                     | 2 (0.26)                  | 0.39 (0.07 – 2.16)       | 0.28 |
| African American  | 538/600                               | 1 (0.19)                     | 3(0.50)                   | 2.79 (0.29 – 27.2)       | 0.38 |
| Japanese American | 834/992                               | 1 (0.12)                     | 0 (0)                     | --                       | --   |
| Latino            | 535/608                               | 1 (0.19)                     | 0 (0)                     | --                       | --   |
| Native Hawaiian   | 237/268                               | 1 (0.42)                     | 1 (0.37)                  | 0.79 (0.05 – 13.4)       | 0.87 |

<sup>1</sup> Odds ratio (OR) and 95% confidence interval (CI) were estimated from logistic regression models adjusting for age and family history of breast cancer. Race/ethnicity was also adjusted in the analysis of overall study population.

<sup>2</sup> Controls selected in the MEC were cancer-free women.
